# Supplementary material for: Functional annotation of noncoding mutations in cancer
Source: Life Sci Alliance. 2021 Jul 19;4(9):e201900523. doi: 10.26508/lsa.201900523 (PMC8321657; doi:10.26508/lsa.201900523)
Supplement: Supplementary file 4 [file LSA-2019-00523_TableS4.xls]

## Sheet: TableS4
Table S4	Significantly mutated regulatory elements from lyphoma cohorts
Position	Functional Score	Max FDR	Num. Regulatory mutations	Num. Samples with regulatory mutations	Num. Mutations	Num. Samples with mutations	Sig. In Cohorts	Num. Mutations per Cancer Type	Functional type
chr14:106329114-106331006	2142.89838749801	1.46964699706694e-85	650	109	2846	132	Hematopoietic-system-tumors,Lymphatic-system-tumors	Lymph-CLL:602,Lymph-NOS:52,Lymph-BNHL:2192	proximal_promoter
chr14:106328261-106328834	273.139278667	0.00197645283919572	77	29	757	56	Lymph-CLL,Lymphatic-system-tumors,Lymph-BNHL,Hematopoietic-system-tumors	Lymph-CLL:91,Lymph-NOS:6,Lymph-BNHL:660	intergenic
chr14:106240958-106241658	69.042540001	4.57370793917888e-05	37	9	248	28	Hematopoietic-system-tumors,Lymphatic-system-tumors,Lymph-BNHL	Lymph-CLL:22,Lymph-BNHL:226	intergenic
chr12:122461600-122461723	45.698645	0.000111632714984917	13	11	60	15	Hematopoietic-system-tumors,Lymph-CLL,Lymphatic-system-tumors	Lymph-CLL:6,Lymph-NOS:2,Lymph-BNHL:52	intronic
chr14:106114416-106114759	27.92225	1.8815038646506e-05	10	2	114	13	Hematopoietic-system-tumors,Lymphatic-system-tumors,Lymph-BNHL	Lymph-BNHL:114	intergenic
chr19:10305199-10305291	20.25951	7.32125019889754e-09	5	4	29	7	Hematopoietic-system-tumors,Lymphatic-system-tumors,Lymph-BNHL	Lymph-NOS:8,Lymph-BNHL:21	UTR
chr22:23198064-23198357	25.2787225	0.0415898989098761	9	1	38	7	Hematopoietic-system-tumors,Lymphatic-system-tumors,Lymph-BNHL	Lymph-CLL:2,Lymph-BNHL:36	intergenic
chr16:11348406-11348738	32.556165	1.43741676326383e-06	8	6	51	6	Hematopoietic-system-tumors,Lymphatic-system-tumors,Lymph-BNHL	Lymph-BNHL:51	UTR
chrX:12994080-12994220	23.8256	1.17855659371515e-06	6	4	51	5	Hematopoietic-system-tumors,Lymphatic-system-tumors,Lymph-BNHL	Lymph-BNHL:51	UTR
chr11:111249425-111249675	15.24064	1.30498168862822e-05	4	3	18	4	Hematopoietic-system-tumors,Lymphatic-system-tumors,Lymph-BNHL	Lymph-BNHL:18	intronic
chr12:8763946-8763968	15.2614	1.04597019692954e-06	3	3	21	4	Hematopoietic-system-tumors,Lymphatic-system-tumors,Lymph-BNHL	Lymph-BNHL:21	intronic
chr14:96179958-96180093	11.525795	2.51122225499838e-08	3	2	13	4	Lymph-CLL	Lymph-CLL:13	intronic
chr14:106213665-106214127	8.18077	0.00440599008121451	4	1	11	4	Lymph-CLL	Lymph-CLL:11	intergenic
chr16:27325617-27326036	18.52653	6.31755113109317e-05	5	4	27	4	Hematopoietic-system-tumors,Lymphatic-system-tumors,Lymph-BNHL	Lymph-BNHL:27	intronic
chr6:91005182-91005326	8.44867	0.000214500410194755	3	3	15	4	Hematopoietic-system-tumors,Lymphatic-system-tumors,Lymph-BNHL	Lymph-BNHL:15	intronic
chr11:29969805-29970025	3.676853	0.000154352290329182	3	1	15	3	Hematopoietic-system-tumors,Lymphatic-system-tumors,Lymph-BNHL	Lymph-CLL:4,Lymph-BNHL:11	intergenic
chr12:120729649-120729685	3.68413	0.000179420586684206	1	1	9	3	Hematopoietic-system-tumors,Lymphatic-system-tumors,Lymph-BNHL	Lymph-BNHL:9	intergenic
chr14:106323613-106323618	3.42488	0.0315006631604409	1	1	9	3	Hematopoietic-system-tumors,Lymphatic-system-tumors,Lymph-BNHL	Lymph-BNHL:9	proximal_promoter
chr16:11349626-11349708	4.422	1.11260821857869e-05	1	1	9	3	Hematopoietic-system-tumors,Lymphatic-system-tumors,Lymph-BNHL	Lymph-BNHL:9	intronic
chr18:29136037-29136039	13.71342	7.32125019889754e-09	3	3	9	3	Hematopoietic-system-tumors,Lymphatic-system-tumors,Lymph-BNHL	Lymph-BNHL:9	intergenic
chr3:187619400-187619434	3.28801	0.000289223819506715	1	1	24	3	Hematopoietic-system-tumors,Lymphatic-system-tumors,Lymph-BNHL	Lymph-BNHL:24	intergenic
chr6:26123485-26123727	17.480965	0.000170081131439621	4	2	18	3	Hematopoietic-system-tumors,Lymphatic-system-tumors,Lymph-BNHL	Lymph-BNHL:18	proximal_promoter
chr8:123248567-123248647	2.42502	0.000182049489050524	1	1	9	3	Hematopoietic-system-tumors,Lymphatic-system-tumors,Lymph-BNHL	Lymph-BNHL:9	intergenic
