# Supplementary material for: Functional annotation of noncoding mutations in cancer
Source: Life Sci Alliance. 2021 Jul 19;4(9):e201900523. doi: 10.26508/lsa.201900523 (PMC8321657; doi:10.26508/lsa.201900523)
Supplement: Supplementary file 8 [file LSA-2019-00523_TableS8.xls]

## Sheet: TableS8
Table S8	Cancer type - cell line matches
Cancer type	Cell lines/Tissues
Biliary-AdenoCA	TGBC14TKB,TGBC2TKB
Bladder-TCC	UT189,TGBC14TKB,TGBC2TKB,Bladder
Bone-Osteosarc	osteoblast,U2OS,HS-Os-1
Bone-Epith	osteoblast,U2OS,HS-Os-1
Bone-Cart	osteoblast,U2OS,HS-Os-1
Breast-AdenoCa	MCF-7,T47D,MCF 10A,HMEC,MDA-MB-453,Breast - Mammary Tissue
Breast-LobularCa	MCF-7,T47D,MCF 10A,HMEC,MDA-MB-453,Breast - Mammary Tissue
Breast-DCIS	MCF-7,T47D,MCF 10A,HMEC,MDA-MB-453,Breast - Mammary Tissue
Cervix-SCC	HeLa-S3,ME-180,D98-AH2,HCSC-1,Cervix - Endocervix
Cervix-AdenoCA	HeLa-S3,ME-180,D98-AH2,HCSC-1,Cervix - Endocervix
Lymph-CLL	GM12878,SKW-3,Cells - EBV-transformed lymphocytes
Lymph-BNHL	GM12878,CTB-1,MLMA,Whole Blood
Lymph-NOS	GM12878,CTB-1,MLMA,Whole Blood
Myeloid-MPN	K562,KBM7,Whole Blood
Myeloid-MDS	K562,KBM7,Whole Blood
Myeloid-AML	K562,KG-1,Kasumi-1,Kasumi-3,Kasumi-6,M-MOK,MKPL-1,NKM-1,NOMO-1,THP-1,U-937,EEB,EoL-1,EoL-3,F-36E,F-36P,FKH-1,HL60,HYT-1,Brain - Spinal cord (cervical c-1)
Eso-AdenoCa	epithelial cell of esophagus,FHs,Esophagus - Gastroesophageal Junction
Stomach-AdenoCA	Gastric,GSS,AZ521,MKN1,MKN45,Stomach
CNS-GBM	astrocyte,T98G,A172,Brain - Cerebellar Hemisphere
Kidney-ChRCC	HEK293,Kidney - Cortex
Kidney-RCC	HEK293,OS-RC-2,TUHR10TKB,Kidney - Cortex
CNS-Oligo	astrocyte,GI-1,Brain - Cerebellar Hemisphere
Liver-HCC	HepG2,Liver
Lung-AdenoCA	A549,IMR-90,NCI-H441,PC-14,Lung
Lung-SCC	A549,IMR-90,LC-1F,EBC-1,Lung
Skin-Melanoma	keratinocyte,NHEK,G-361,Skin - Sun Exposed (Lower leg)
Head-SCC	Ca9-22,HO-1-u-1,HSC-3,SAS,Thyroid
Ovary-AdenoCA	Ovary,SK-OV-3-R
Panc-AdenoCA	Panc1,NOR-P1,Pancreas
Panc-Endocrine	Panc1,NOR-P1,Pancreas
CNS-Medullo	SK-N-SH,Brain - Cerebellar Hemisphere
CNS-PiloAstro	SK-N-SH,Brain - Cerebellar Hemisphere
Prost-AdenoCA	LNCaP clone FGC,DU145,PC-3,Prostate
ColoRect-AdenoCA	HCT116,COLO-320,CACO-2,TT1TKB,Colon - Sigmoid
Bone-Leiomyo	HS-ES-1
Thy-AdenoCA	TCO-1,KHM-5M,Thyroid
Uterus-AdenoCA	Ishikawa,urothelium cell line,OMC-2,Uterus
